# Supplementary material for: Enhanced VOC recycling by nano-Fe/FeOx decorated nanoporous carbon
Source: Royal Society of Chemistry journal article supplement (doi:10.1039/d5en00019j), 2025-01-01
Supplement: d5en00019j1.pdf [file d5en00019j1.pdf]

## Supporting Information:

### Enhanced VOCs Recycling by Nano Fe/FeO<sub>x</sub> Decorated Nano Porous Carbon

Weiping Zhang, <sup>\*ab</sup> Xiong Xiao, <sup>ab</sup> Xiaoqin Wang, <sup>ab</sup> Hongli Liu, <sup>ab</sup> Xingye Zeng <sup>c</sup> and Taicheng An <sup>ab</sup>

<sup>a</sup> *Guangdong Key Laboratory of Environmental Catalysis and Health Risk Control, Guangdong-Hong Kong-Macao Joint Laboratory for Contaminants Exposure and Health, Institute of Environmental and Chemical Engineering Innovation, Institute of Environmental Health and Pollution Control, Guangdong University of Technology, Guangzhou 510006, China*

<sup>b</sup> *National Engineering Laboratory for VOCs Pollution Control Material & Technology Guangdong Branch, Guangdong Basic Research Center of Excellence for Ecological Security and Green Development, Guangdong Engineering Technology Research Centre for Photocatalytic Technology Integration and Equipment, School of Environmental Science and Engineering, Guangdong University of Technology, Guangzhou 510006, China.*

<sup>c</sup> *School of Chemical Engineering, Guangdong University of Petrochemical Technology, Maoming, 525000, P. R. China.*

#### \*Corresponding Author:

Assoc. Prof. Weiping Zhang; E-mail: wp.zhang86@gdut.edu.cn

## Table of contents

**Fig. S1.** Raman spectra of Fe-C-850 and C-850 adsorbents.

**Fig. S2.** N<sub>2</sub> adsorption-desorption isotherms and pore distribution of Fe-C composites synthesized at different pyrolysis temperatures.

**Fig. S3.** FT-IR spectra of Fe-C composites synthesized at different pyrolysis temperature.

**Fig. S4.** TG-DSC curves of organic dry gel precursor pyrolyzed with argon gas protection (a, pure carbon gel precursor; b, Fe-C composite gel precursor).

**Fig. S5.** Adsorption capacity of Fe-C composites with different Fe-C molar ratios at pyrolysis temperatures of 600 °C.

**Fig. S6.** Time-temperature variation curve of Fe-C-600, Fe-C-750 and C-750 adsorbents.

**Fig. S7.** Infrared thermal image of Fe-C-600 adsorbents.

**Fig. S8.** Infrared thermal image of Fe-C-750 adsorbents.

**Fig. S9.** Infrared thermal image of C-750 adsorbents.

**Fig. S10.** High resolution X-ray photoelectron spectroscopy (XPS) spectra of C1s (a), O1s (b) and Fe2p (c) before and after EA adsorption by Fe-C-600.

**Fig. S11.** High resolution X-ray photoelectron spectroscopy (XPS) spectra of C1s (a), O1s (b) and Fe2p (c) before and after toluene adsorption by Fe-C-750.

**Table S1.** I<sub>D</sub>/I<sub>G</sub> of the tested Fe-C composites by the deconvolution of Raman spectra.

**Table S2.** Porous structure and specific surface area of the tested Fe-C composites.

**Table S3.** Concentration of oxygen-containing groups of Fe-C composites measured by a Boehm's titration quantitative method.

**Table S4.** Spearman correlations of EA adsorption with pore structure, functional groups and other factors.

**Table S5.** Spearman correlations of toluene adsorption with pore structure, functional groups and other factors.

**Table S6.** Proportion of functional groups on Fe-C-600 by deconvolution of XPS C1s, O1s and Fe2p spectra.

**Table S7.** Proportion of functional groups on Fe-C-750 by deconvolution of XPS C1s, O1s and Fe2p spectra.

**Table S8.** Adsorption and desorption performance of carbon materials as compared previous reports.

## Experiments

### **Materials:**

Bacterial cellulose was purchased from Guilin Qihong Technology Store (Guangxi, China). Ferric acetate ( $C_4H_7FeO_5 \cdot nH_2O$ ), ethanol ( $C_2H_6O$ , 95%) and sucrose were purchased from Macklin Biochemical Co., Ltd. Hydrochloric acid ( $HCl > 98.0\%$ ), sodium hydroxide ( $NaOH$ ), sodium bicarbonate ( $NaHCO_3$ , 99%), sodium carbonate ( $Na_2CO_3$ , 99%) were purchased from Guangzhou Weigu Technology Co., Ltd (Guangzhou, China). The standard ethyl acetate (EA) and toluene gas were purchased from Foshan Deli MESSER Gas Co., Ltd (Foshan, China). All of the chemical reagents were analytical-grade and used as received without further purification. Deionized water was used throughout the experiments.

### **Evaluation of Adsorption performance:**

The adsorption experiments were carried out in a circular quartz reactor with a fixed bed at room temperature. To eliminate moisture and contaminants from the material, the adsorbents ( $20 \pm 0.1$  mg) were typically processed at  $150^\circ C$  for 1 h under vacuum before cooling to ambient temperature in a  $N_2$  flow. The  $N_2$  gas flow rate utilized as the EA and toluene carrier in the gas-phase adsorption process was kept constant at  $30 \text{ mL min}^{-1}$  to keep the inflow concentration of EA and toluene at 40 ppm (7% fluctuations). The EA and toluene content in the output gas was then continually measured using an online gas chromatograph equipped with a flame ionization detector. The adsorption capacity was determined by the difference between inlet and outlet VOC concentration. When the adsorption bed layer was saturated, the adsorption amount ( $q$ ,  $\text{mg g}^{-1}$ ) was calculated as follows<sup>[1]</sup>:

$$q = \frac{Q}{m * 10^{-6}} \int_0^{t_s} (C_{in} - C_{out}) dt$$

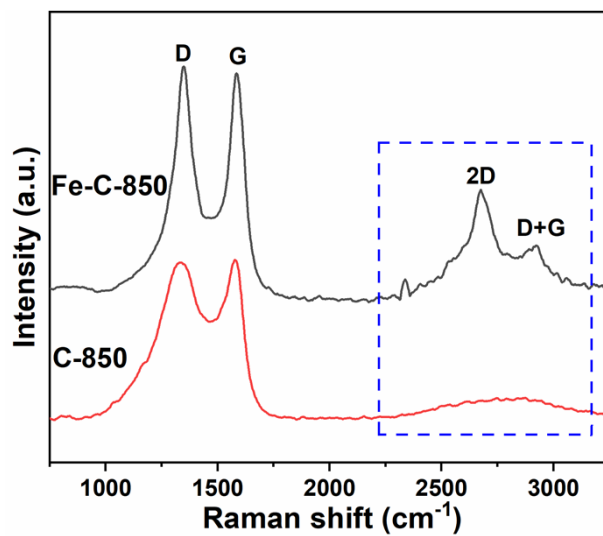

**Fig. S1.** Raman spectra of Fe-C-850 and C-850 adsorbents.

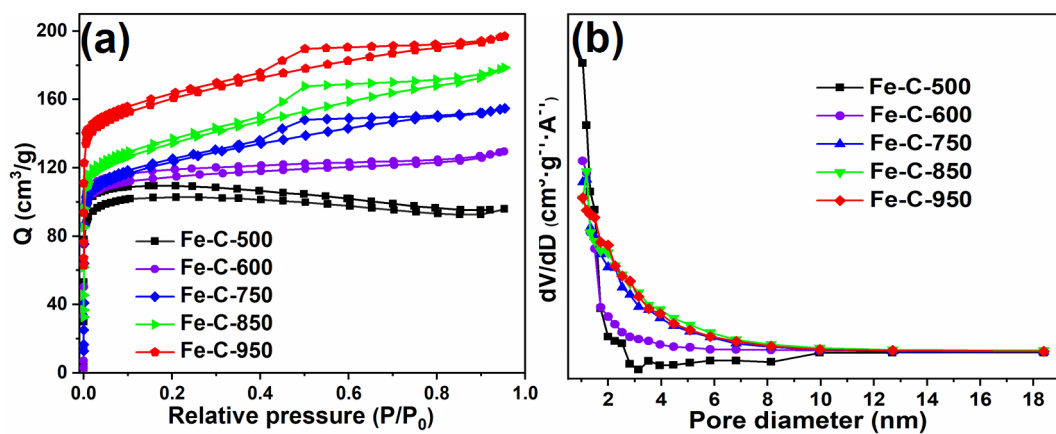

**Fig. S2.** N<sub>2</sub> adsorption-desorption isotherms and pore distribution of Fe-C composites synthesized at different pyrolysis temperatures.

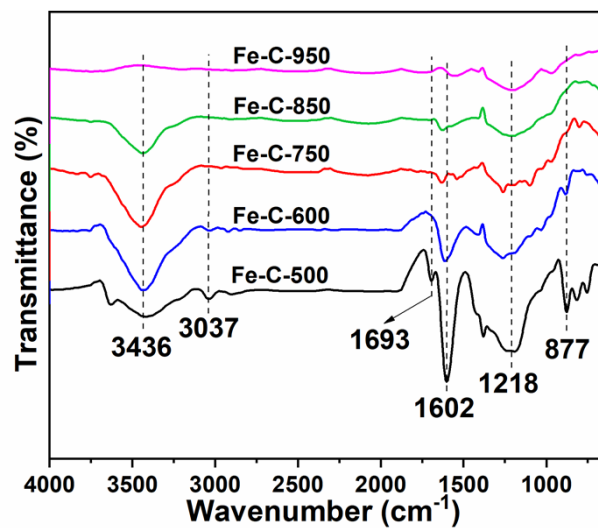

**Fig. S3.** FT-IR spectra of Fe-C composites synthesized at different pyrolysis temperature.

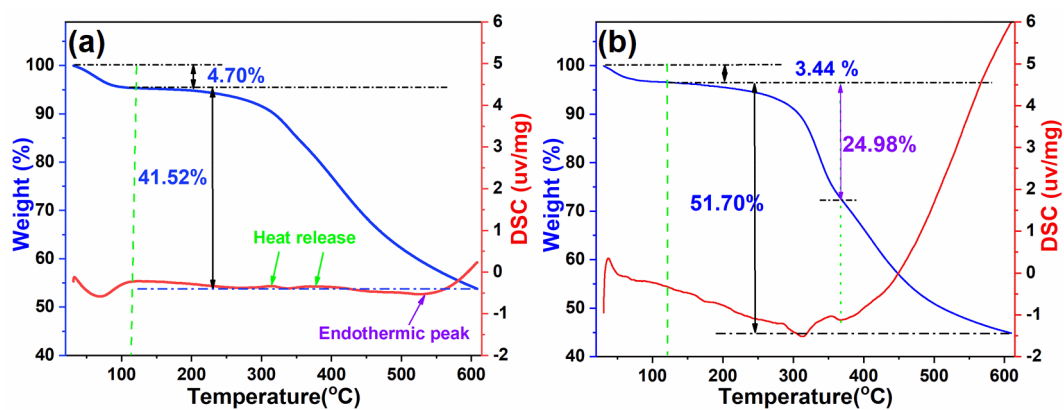

**Fig. S4.** TG-DSC curves of organic dry gel precursor pyrolyzed with argon gas protection (a, pure carbon gel precursor; b, Fe-C composite gel precursor).

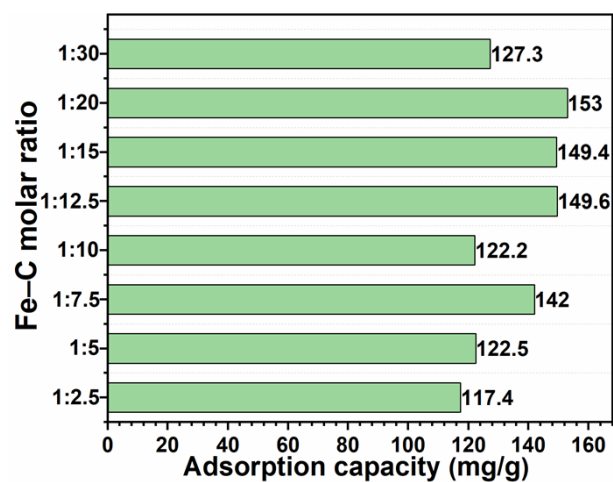

**Fig. S5.** Adsorption capacity of Fe-C composites with different Fe-C molar ratios at pyrolysis temperatures of 600 °C. The adsorption capacity increased significantly to 153 mg·g<sup>-1</sup> as the molar ratio of Fe to C decreased from 1:2.5 to 1:20. However, the adsorption capacity started to decrease gradually to 127.3 mg·g<sup>-1</sup> as the molar ratio further decreased from 1:20 to 1:30.

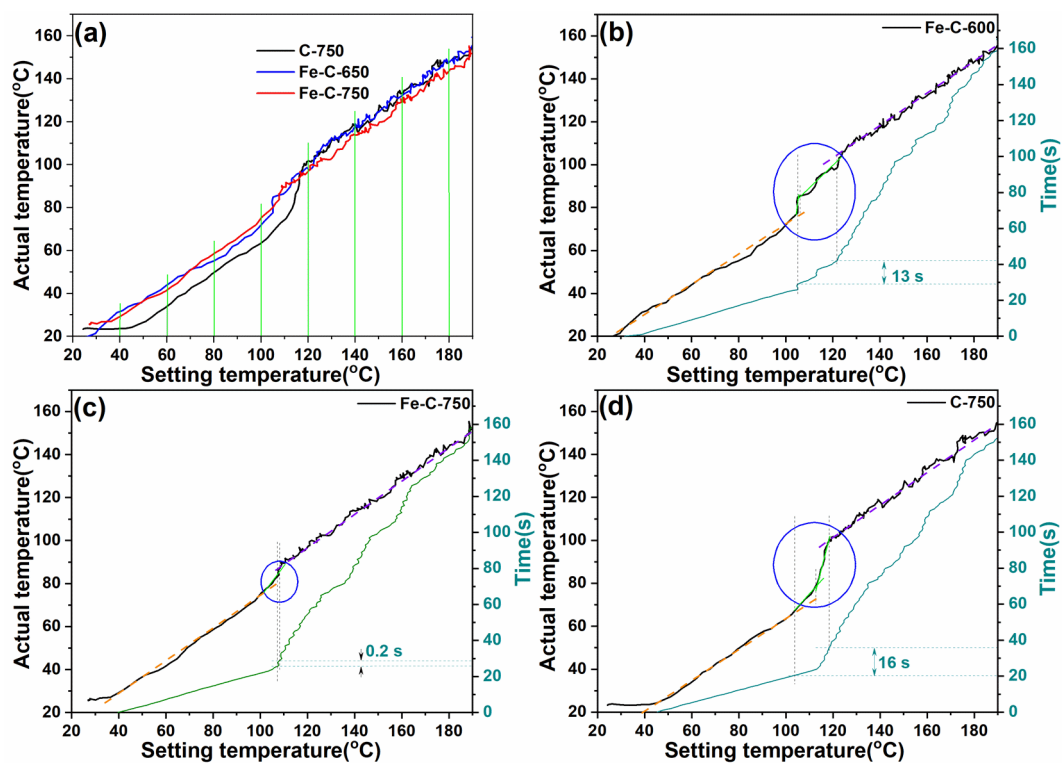

**Fig. S6.** Time-temperature variation curve of Fe-C-600, Fe-C-750 and C-750 adsorbents.

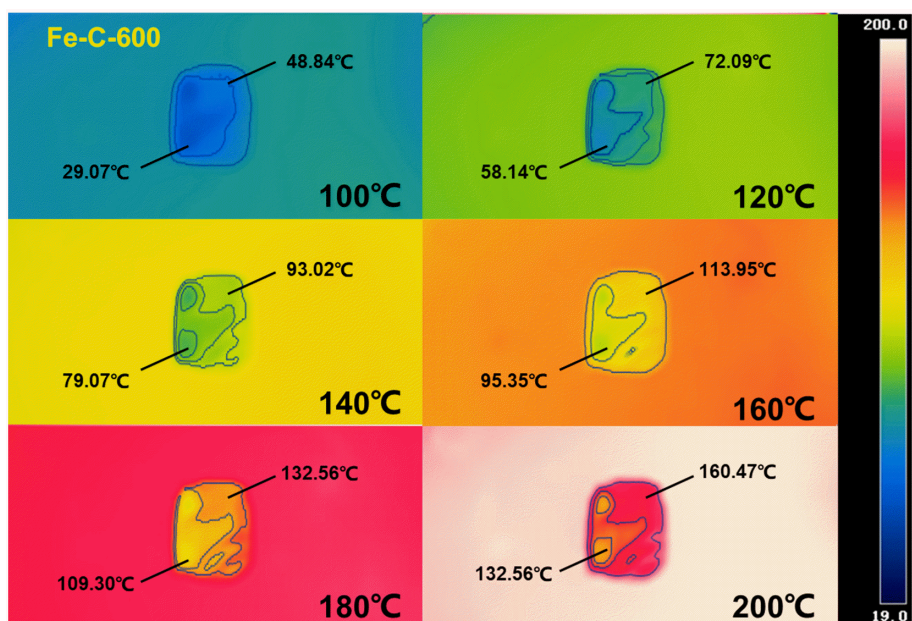

**Fig. S7.** Infrared thermal image of Fe-C-600 adsorbents.

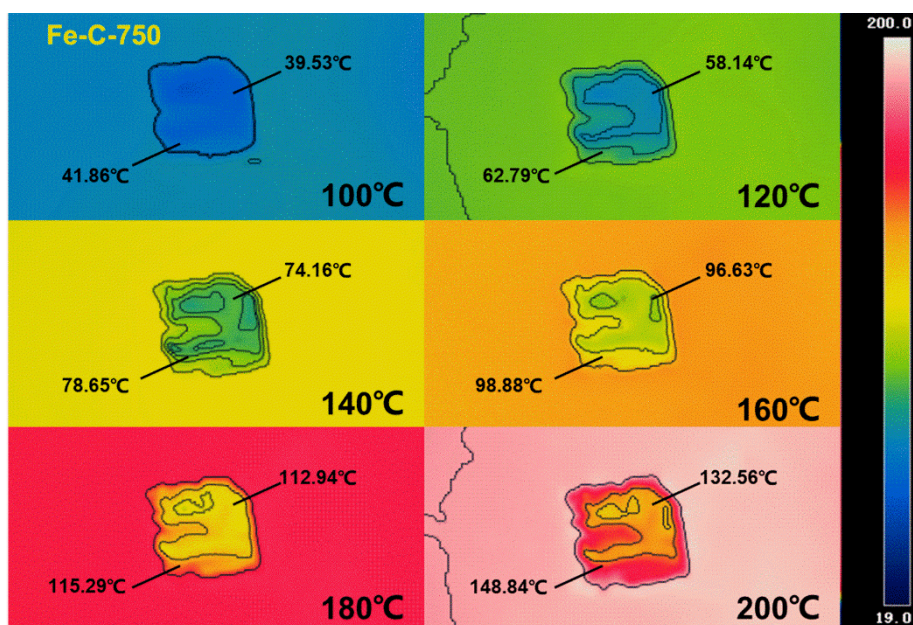

**Fig. S8.** Infrared thermal image of Fe-C-750 adsorbents.

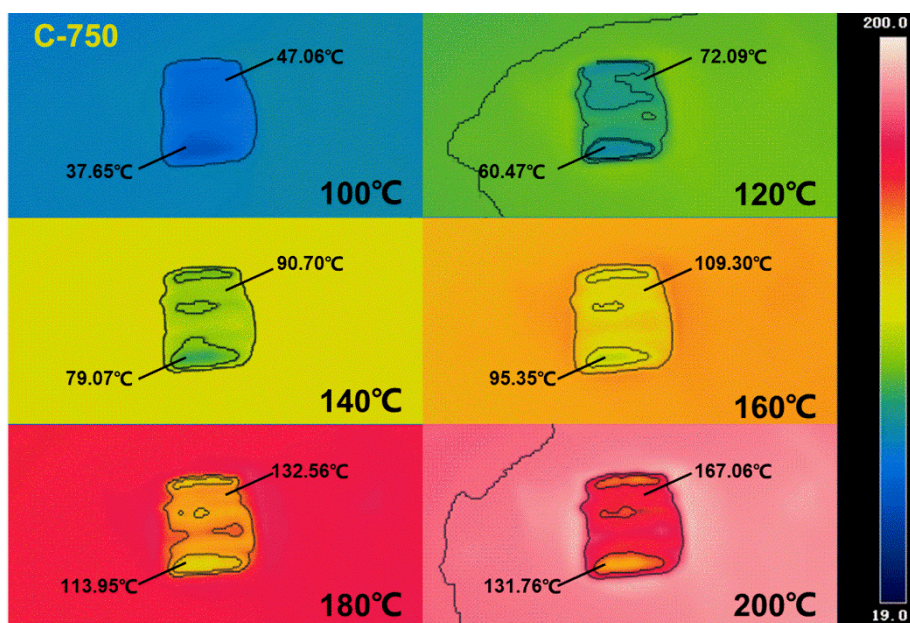

**Fig. S9.** Infrared thermal image of C-750 adsorbents.

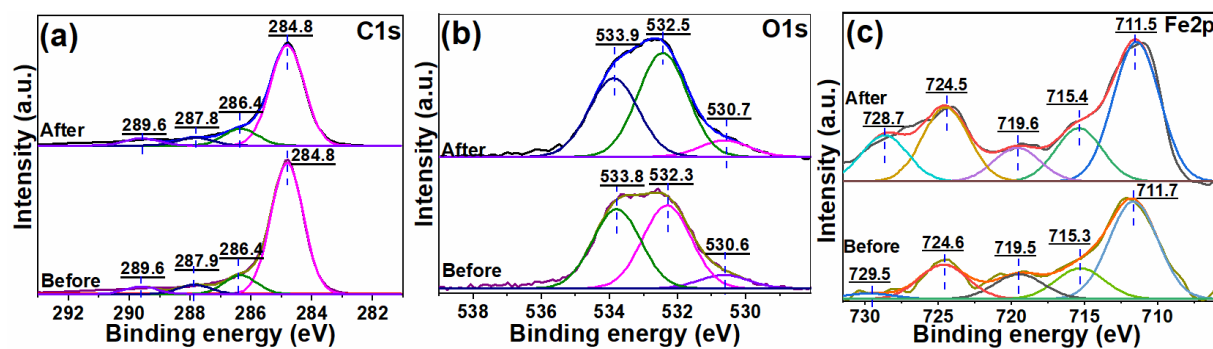

**Fig. S10.** High resolution X-ray photoelectron spectroscopy (XPS) spectra of C1s (a), O1s (b) and Fe2p (c) before and after EA adsorption by Fe-C-600.

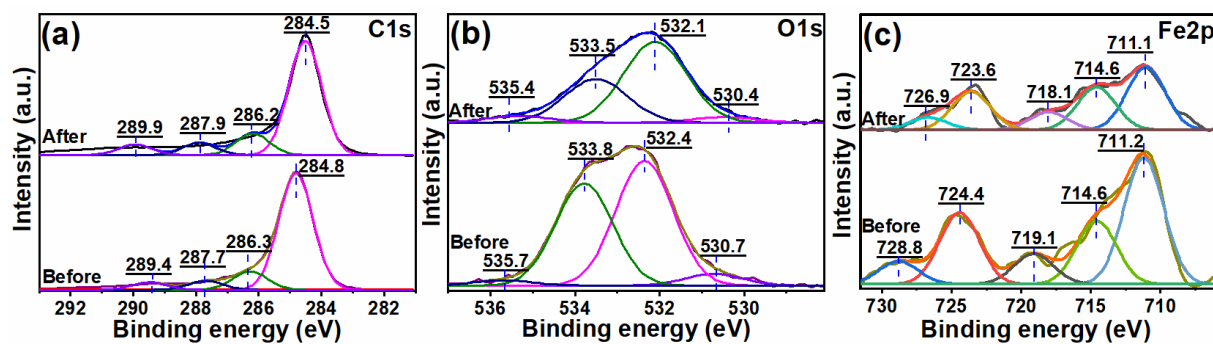

**Fig. S11.** High resolution X-ray photoelectron spectroscopy (XPS) spectra of C1s (a), O1s (b) and Fe2p (c) before and after toluene adsorption by Fe-C-750.

**Table S1.**  $I_D/I_G$  of the tested Fe-C composites by the deconvolution of Raman spectra.

| Sample name | $I_D/I_G$ |
|-------------|-----------|
| Fe-C-500    | 1.95      |
| Fe-C-600    | 1.74      |
| Fe-C-750    | 1.48      |
| Fe-C-850    | 1.44      |
| Fe-C-950    | 1.41      |
| C-850       | 2.70      |

**Table S2.** Porous structure and specific surface area of the tested Fe-C composites.

| Sample name | $D_{BET}$ (nm) | $S_{BET}$ (m <sup>2</sup> •g <sup>-1</sup> ) | Porosity Distribution by DFT Model |                       |                       |
|-------------|----------------|----------------------------------------------|------------------------------------|-----------------------|-----------------------|
|             |                |                                              | $V_{total}$                        | $V_{mic}$             | $V_{meso+Mac}$        |
|             |                |                                              | (mL•g <sup>-1</sup> )              | (mL•g <sup>-1</sup> ) | (mL•g <sup>-1</sup> ) |
| Fe-C-500    | 1.94           | 306.37                                       | 0.15                               | 0.061                 | 0.089                 |
| Fe-C-600    | 2.30           | 348.28                                       | 0.20                               | 0.10                  | 0.10                  |
| Fe-C-750    | 2.48           | 361.30                                       | 0.22                               | 0.064                 | 0.17                  |
| Fe-C-850    | 2.72           | 338.12                                       | 0.23                               | 0.056                 | 0.17                  |
| Fe-C-950    | 2.60           | 326.20                                       | 0.21                               | 0.056                 | 0.16                  |
| C-750       | 3.41           | 163.66                                       | 0.14                               | 0.063                 | 0.079                 |

**Table S3.** Concentration of oxygen-containing groups of Fe-C composites measured by a Boehm's titration quantitative method.

| Samples  | Concentration of oxygen-containing groups ( $\mu\text{mmol g}^{-1}$ ) |                |                |             |       |
|----------|-----------------------------------------------------------------------|----------------|----------------|-------------|-------|
|          | Carboxylic group                                                      | Phenolic group | Lactonic group | Basic group | Total |
| Fe-C-500 | 0.286                                                                 | 1.234          | 0.269          | 3.293       | 5.082 |
| Fe-C-600 | 0.0930                                                                | 1.217          | 0.265          | 3.520       | 5.095 |
| Fe-C-750 | 0.0716                                                                | 0.350          | 0.867          | 3.293       | 4.582 |
| Fe-C-850 | 0.0357                                                                | 0.143          | 0.608          | 2.611       | 3.398 |
| Fe-C-950 | 0.0710                                                                | 0.215          | 0.429          | 3.564       | 4.279 |

**Table S4.** Spearman correlations of EA adsorption with pore structure, functional groups and other factors.

|             | $Q_{EA}$ | $T_p$ | $W_{Fe}$ | $S_{BET}$ | $V_{total}$ | Carboxyl | Base  | PhOH  | Lactonyl | $D_p$ | $V_{mic}$ | $V_{meso}$ |
|-------------|----------|-------|----------|-----------|-------------|----------|-------|-------|----------|-------|-----------|------------|
| $Q_{EA}$    | 1.00     | -0.80 | 0.50     | 0.10      | -0.80       | 0.90     | 0.36  | 0.90  | -0.70    | -0.90 | 1.00      | -1.00      |
| $T_p$       | -0.80    | 1.00  | -0.70    | 0.10      | 0.70        | -0.90    | 0.21  | -0.90 | 0.50     | 0.90  | -0.80     | 0.80       |
| $W_{Fe}$    | 0.50     | -0.70 | 1.00     | 0.40      | -0.20       | 0.60     | -0.36 | 0.60  | 0.20     | -0.60 | 0.50      | -0.50      |
| $S_{BET}$   | 0.10     | 0.10  | 0.40     | 1.00      | 0.50        | -0.20    | -0.10 | -0.20 | 0.40     | 0.20  | 0.10      | -0.10      |
| $V_{total}$ | -0.80    | 0.70  | -0.20    | 0.50      | 1.00        | -0.90    | -0.46 | -0.90 | 0.80     | 0.90  | -0.80     | 0.80       |
| Carboxyl    | 0.90     | -0.90 | 0.60     | -0.20     | -0.90       | 1.00     | 0.21  | 1.00  | -0.60    | -1.00 | 0.90      | -0.90      |
| Base        | 0.36     | 0.21  | -0.36    | -0.10     | -0.46       | 0.21     | 1.00  | 0.21  | -0.46    | -0.21 | 0.36      | -0.36      |
| PhOH        | 0.90     | -0.90 | 0.60     | -0.20     | -0.90       | 1.00     | 0.21  | 1.00  | -0.60    | -1.00 | 0.90      | -0.90      |
| Lactonyl    | -0.70    | 0.50  | 0.20     | 0.40      | 0.80        | -0.60    | -0.46 | -0.60 | 1.00     | 0.60  | -0.70     | 0.70       |
| $D_p$       | -0.90    | 0.90  | -0.60    | 0.20      | 0.90        | -1.00    | -0.21 | -1.00 | 0.60     | 1.00  | -0.90     | 0.90       |
| $V_{mic}$   | 1.00     | -0.80 | 0.50     | 0.10      | -0.80       | 0.90     | 0.36  | 0.90  | -0.70    | -0.90 | 1.00      | -1.00      |
| $V_{meso}$  | -1.00    | 0.80  | -0.50    | -0.10     | 0.80        | -0.90    | -0.36 | -0.90 | 0.70     | 0.90  | -1.00     | 1.00       |

**Footnote:** Q=adsorption capacity/mg g<sup>-1</sup>; T=temperature/°C; concentration of Fe (C<sub>Fe</sub>)/wt%; Concentration of functional group/ $\mu\text{mmol g}^{-1}$ ; S/m<sup>2</sup> g<sup>-1</sup>; pore volume(V)/mL g<sup>-1</sup>

**Table S5.** Spearman correlations of toluene adsorption with pore structure, functional groups and other factors.

|                          | <b>Q<sub>tol</sub></b> | <b>T<sub>p</sub></b> | <b>W<sub>Fe</sub></b> | <b>S<sub>BET</sub></b> | <b>V<sub>total</sub></b> | <b>Carboxyl</b> | <b>Base</b> | <b>PhOH</b> | <b>Lactonyl</b> | <b>D<sub>p</sub></b> | <b>V<sub>mic</sub></b> | <b>V<sub>meso</sub></b> |
|--------------------------|------------------------|----------------------|-----------------------|------------------------|--------------------------|-----------------|-------------|-------------|-----------------|----------------------|------------------------|-------------------------|
| <b>Q<sub>tol</sub></b>   | 1.00                   | 0.10                 | 0.40                  | 1.00                   | 0.50                     | -0.20           | -0.10       | -0.20       | 0.40            | 0.20                 | 0.10                   | -0.10                   |
| <b>T<sub>p</sub></b>     | 0.10                   | 1.00                 | -0.70                 | 0.10                   | 0.70                     | -0.90           | 0.21        | -0.90       | 0.50            | 0.90                 | -0.80                  | 0.80                    |
| <b>W<sub>Fe</sub></b>    | 0.40                   | -0.70                | 1.00                  | 0.40                   | -0.20                    | 0.60            | -0.36       | 0.60        | 0.20            | -0.60                | 0.50                   | -0.50                   |
| <b>S<sub>BET</sub></b>   | 1.00                   | 0.10                 | 0.40                  | 1.00                   | 0.50                     | -0.20           | -0.10       | -0.20       | 0.40            | 0.20                 | 0.10                   | -0.10                   |
| <b>V<sub>total</sub></b> | 0.50                   | 0.70                 | -0.20                 | 0.50                   | 1.00                     | -0.90           | -0.46       | -0.90       | 0.80            | 0.90                 | -0.80                  | 0.80                    |
| <b>Carboxyl</b>          | -0.20                  | -0.90                | 0.60                  | -0.20                  | -0.90                    | 1.00            | 0.21        | 1.00        | -0.60           | -1.00                | 0.90                   | -0.90                   |
| <b>Base</b>              | -0.10                  | 0.21                 | -0.36                 | -0.10                  | -0.46                    | 0.21            | 1.00        | 0.21        | -0.46           | -0.21                | 0.36                   | -0.36                   |
| <b>PhOH</b>              | -0.20                  | -0.90                | 0.60                  | -0.20                  | -0.90                    | 1.00            | 0.21        | 1.00        | -0.60           | -1.00                | 0.90                   | -0.90                   |
| <b>Lactonyl</b>          | 0.40                   | 0.50                 | 0.20                  | 0.40                   | 0.80                     | -0.60           | -0.46       | -0.60       | 1.00            | 0.60                 | -0.70                  | 0.70                    |
| <b>D<sub>p</sub></b>     | 0.20                   | 0.90                 | -0.60                 | 0.20                   | 0.90                     | -1.00           | -0.21       | -1.00       | 0.60            | 1.00                 | -0.90                  | 0.90                    |
| <b>V<sub>mic</sub></b>   | 0.10                   | -0.80                | 0.50                  | 0.10                   | -0.80                    | 0.90            | 0.36        | 0.90        | -0.70           | -0.90                | 1.00                   | -1.00                   |
| <b>V<sub>meso</sub></b>  | -0.10                  | 0.80                 | -0.50                 | -0.10                  | 0.80                     | -0.90           | -0.36       | -0.90       | 0.70            | 0.90                 | -1.00                  | 1.00                    |

**Footnote:** Q=adsorption capacity/mg g<sup>-1</sup>; T=temperature/°C; concentration of Fe (C<sub>Fe</sub>) /wt%; Concentration of functional group/μmmol g<sup>-1</sup>; S/m<sup>2</sup> g<sup>-1</sup>; pore volume(V)/mL g<sup>-1</sup>

**Table S6.** Proportion of functional groups on Fe-C-600 by deconvolution of XPS C1s, O1s and Fe2p spectra.

|             | Fe-C-600 before EA adsorption |              |              |              | Fe-C-600 after regeneration |              |              |              |
|-------------|-------------------------------|--------------|--------------|--------------|-----------------------------|--------------|--------------|--------------|
|             | Peak/eV                       | Groups       | Proportion/% | Total /%     | Peak/eV                     | Groups       | Proportion/% | Total /%     |
| <b>C1s</b>  | 284.8                         | C-C          | 78.82        | <b>85.29</b> | 284.8                       | C-C          | 75.82        | <b>80.34</b> |
|             | 286.4                         | C-OH         | 11.23        |              | 286.4                       | C-OH         | 12.68        |              |
|             | 287.9                         | C-O          | 5.56         |              | 287.8                       | C-O          | 6.18         |              |
|             | 289.6                         | C=O          | 4.40         |              | 289.6                       | C=O          | 5.32         |              |
| <b>O1s</b>  | 530.6                         | C=O          | 7.65         | <b>13.42</b> | 530.7                       | C=O          | 7.57         | <b>17.16</b> |
|             | 532.3                         | O=C-O-(C, O) | 47.27        |              | 532.5                       | O=C-O-(C, O) | 52.64        |              |
|             | 533.8                         | C-O-C        | 45.08        |              | 533.9                       | C-O-C        | 39.79        |              |
| <b>Fe2p</b> | 724.6                         | 1/2          | 25.9         | <b>1.29</b>  | 724.5                       | 1/2          | 34.7         | <b>2.50</b>  |
|             | 711.7                         | 3/2          | 74.1         |              | 711.5                       | 3/2          | 65.3         |              |

**Table S7.** Proportion of functional groups on Fe-C-750 by deconvolution of XPS C1s, O1s and Fe2p spectra.

|             | Fe-C-750 before Toluene adsorption |              |              |              | Fe-C-750 after regeneration |              |              |              |
|-------------|------------------------------------|--------------|--------------|--------------|-----------------------------|--------------|--------------|--------------|
|             | Peak/eV                            | Groups       | Proportion/% | Total /%     | Peak/eV                     | Groups       | Proportion/% | Total /%     |
| <b>C1s</b>  | 284.8                              | C-C          | 76.97        | <b>81.08</b> | 284.5                       | C-C          | 72.16        | <b>88.11</b> |
|             | 286.3                              | C-OH         | 12.20        |              | 286.2                       | C-OH         | 13.60        |              |
|             | 287.7                              | C-O          | 5.87         |              | 287.9                       | C-O          | 7.67         |              |
|             | 289.4                              | C=O          | 4.96         |              | 289.9                       | C=O          | 6.58         |              |
| <b>O1s</b>  | 530.7                              | C=O          | 4.72         | <b>17.57</b> | 530.4                       | C=O          | 3.94         | <b>11.14</b> |
|             | 532.4                              | O=C-O-(C, O) | 51.21        |              | 532.1                       | O=C-O-(C, O) | 59.32        |              |
|             | 533.8                              | C-O-C        | 41.92        |              | 533.5                       | C-O-C        | 31.94        |              |
|             | 535.7                              | O=C-O-(C,O)  | 2.15         |              | 535.4                       | O=C-O-(C,O)  | 4.79         |              |
| <b>Fe2p</b> | 724.4                              | 1/2          | 36.16        | <b>1.35</b>  | 723.6                       | 1/2          | 37.86        | <b>0.75</b>  |
|             | 711.2                              | 3/2          | 63.84        |              | 711.1                       | 3/2          | 62.14        |              |

**Table S8.** Adsorption and desorption performance of carbon materials as compared previous reports.

| Adsorbent type            | Adsorption capacity    |                             | Regenerated performance | Regenerated temperature | reference     |
|---------------------------|------------------------|-----------------------------|-------------------------|-------------------------|---------------|
|                           | Toluene                | EA                          | --                      | --                      |               |
| Fe-C composites           | 200 mg·g <sup>-1</sup> | 154 mg·g <sup>-1</sup>      | 100%                    | 120 °C                  | This research |
| Nano-porous carbon        | --                     | 1.28~142 mg·g <sup>-1</sup> | 63~88%                  | 120 °C                  | <sup>2</sup>  |
| HAT-650                   | --                     | 140.98 mg·g <sup>-1</sup>   | 84.6%                   | 120 °C                  | <sup>3</sup>  |
| CAR-AC                    | --                     | 61.5 mg·g <sup>-1</sup>     | 91.46%                  | 120 °C                  | <sup>1</sup>  |
| NHPC-CC                   | 547 mg·g <sup>-1</sup> | --                          | 93.69%                  | 300 °C                  | <sup>4</sup>  |
| Coffee ground-AC<br>(BAC) | 536 mg·g <sup>-1</sup> | --                          | 94%                     | 120 °C                  | <sup>5</sup>  |
| C <sub>0.1</sub> @HCS     | 813 mg·g <sup>-1</sup> | --                          | 92.4%                   | 200 °C                  | <sup>6</sup>  |

1. Yao, X.; Liu, Y.; Li, T.; Zhang, T.; Li, H.; Wang, W.; Shen, X.; Qian, F. and Yao, Z., *Journal of Hazardous Materials*, 2020, **392**, 122323.
2. Zhang, W.; Wang, X.; Pan, H.; Zeng, X.; Li, G.; Liu, H.; Kong, J.; Zhao, H. and An, T., *Environmental Science: Nano*, 2023, **10**, 2790-2798.
3. Tan, L.; Wang, J.; Cai, B.; Wang, C.; Ao, Z. and Wang, S., *Journal of Hazardous Materials*, 2022, **424**, 127348.
4. Huang, X.; Tang, M.; Li, H.; Wang, L. and Lu, S., *Chemosphere*, 2023, **313**, 137513.
5. Wang, S.; Xu, J.; Zhang, J.; Lyu, Y. and Chen, S., *Separation and Purification Technology*, 2024, **344**, 127269.
6. Qin, L.; Li, J.; Nestle Asamoah, E.; Zhao, B.; Chen, W. and Han, J., *Langmuir*, 2023, **39**, 6169-6177.
